# Supplementary material
Source: PubMed Central journal article supplement (PMC7964016)
Supplement: 2201_tables.pdf [file 2201_tables.pdf]

**On-line Table 1: Clinical characteristics and endocrinologic findings in 20 patients with LYH**

| Case No.       | Age (yr)/ Sex | No. of MRI Studies | Duration of Follow-Up | Clinical Presentation                              | Complications of Disease                                                                           | Endocrinologic Study                         |          | Replacement Therapy |
|----------------|---------------|--------------------|-----------------------|----------------------------------------------------|----------------------------------------------------------------------------------------------------|----------------------------------------------|----------|---------------------|
|                |               |                    |                       |                                                    |                                                                                                    | AL                                           | PL       |                     |
| 1 <sup>a</sup> | 38/F          | 1                  | 11 Months             | Headache, vomiting, polyuria, polydipsia           |                                                                                                    | Partial-hypo <sup>b</sup> (LH, FSH)          | DI       | Dp, Gc              |
| 2 <sup>a</sup> | 53/M          | 2                  | 8 Months              | Decreased libido                                   |                                                                                                    | Partial-hypo <sup>b</sup> (LH)               | No study | Ts                  |
| 3              | 70/M          | 3                  | 8 Years               | General fatigue                                    |                                                                                                    | Pan-hypo                                     | Normal   | Gc, Lt              |
| 4              | 36/M          | 3                  | 18 Months             | Decreased libido, polyuria, polydipsia             |                                                                                                    | Partial-hypo <sup>b</sup> (GH, LH, FSH, PRL) | DI       | Dp, Gc              |
| 5              | 71/M          | 3                  | 2 Years               | Anorexia, weight loss, polyuria                    | IgG4-related disorders (interstitial nephritis, autoimmune pancreatitis, retroperitoneal fibrosis) | Partial-hypo <sup>b</sup> (LH, FSH)          | DI       | Dp, Gc, TSH         |
| 6              | 48/M          | 4                  | 9 Months              | Diplopia, headache, vomiting, polyuria, polydipsia |                                                                                                    | Pan-hypo                                     | DI       | Dp, Gc, TSH         |
| 7              | 49/M          | 2                  | 5 Years               | Headache, polyuria, polydipsia                     |                                                                                                    | Partial-hypo <sup>b</sup> (GH)               | Normal   | None                |
| 8 <sup>a</sup> | 23/F          | 1                  | 1 Month               | Headache, bitemporal hemianopia                    | Pregnant                                                                                           | Partial-hypo <sup>b</sup> (ACTH)             | No study | None                |
| 9 <sup>a</sup> | 31/M          | 2                  | 16 Months             | Headache, decreased libido, polyuria, polydipsia   |                                                                                                    | Pan-hypo                                     | DI       | Dp, Gc, Ts, TSH     |
| 10             | 70/M          | 4                  | 8 Months              | General fatigue, polyuria, polydipsia              | IgG4-related disorders (autoimmune hepatitis, lymphocytic interstitial pneumonia, Mikulicz synd)   | Pan-hypo                                     | DI       | Gc, Lt              |
| 11             | 58/M          | 5                  | 4 Years               | Slight fever, headache, polyuria, polydipsia       | IgG4-related disorders (chronic thyroiditis, autoimmune pancreatitis)                              | Normal                                       | DI       | Dp, TSH             |
| 12             | 72/F          | 1                  | 10 Months             | Anorexia, weight loss, polyuria                    | Rheumatoid arthritis                                                                               | Partial-hypo <sup>b</sup> (ACTH, PRL)        | DI       | Dp                  |
| 13             | 6/F           | 2                  | 4 Months              | General fatigue, loss of consciousness             | Bullous pemphigoid                                                                                 | Partial-hypo <sup>b</sup> (LH, FSH)          | No study | Gc                  |
| 14             | 23/F          | 6                  | 4 Years               | Polyuria, polydipsia                               |                                                                                                    | Normal                                       | DI       | Dp, Gc              |
| 15             | 35/F          | 5                  | 3 Years               | Amenorrhea, polyuria, polydipsia                   |                                                                                                    | Partial-hypo <sup>b</sup> (LH, FSH)          | DI       | Dp, Gc              |
| 16             | 56/F          | 4                  | 9 Years               | Nausea, polyuria, polydipsia                       |                                                                                                    | Partial-hypo <sup>b</sup> (GH)               | DI       | Dp, Gc              |
| 17             | 60/F          | 6                  | 19 Months             | Bitemporal hemianopia, polyuria, polydipsia        |                                                                                                    | Partial-hypo <sup>b</sup> (LH, FSH)          | DI       | Dp                  |
| 18             | 14/M          | 4                  | 4 Years               | Short stature, polyuria, polydipsia                |                                                                                                    | Partial-hypo <sup>b</sup> (GH, LH, FSH, TSH) | DI       | Dp, GH, TSH         |
| 19             | 9/F           | 5                  | 5 Years               | Short stature, polyuria, polydipsia                |                                                                                                    | Partial-hypo <sup>b</sup> (GH)               | DI       | Dp, GH              |
| 20             | 40/F          | 3                  | 13 Months             | Anhidrosis, polyuria, polydipsia                   |                                                                                                    | Normal                                       | DI       | Dp                  |

<sup>a</sup> Diagnosed histologically by transsphenoidal biopsy.

<sup>b</sup> Insufficient hormones.

**On-line Table 2: Clinical characteristics and endocrinologic findings in 22 patients with PA**

| Case No. | Age (yr)/ Sex | Clinical Presentation               | Endocrinologic Study                                                 |          | Maximum Tumor Size (mm) | Histologic Findings |
|----------|---------------|-------------------------------------|----------------------------------------------------------------------|----------|-------------------------|---------------------|
|          |               |                                     | AL                                                                   | PL       |                         |                     |
| 1        | 73/F          | Disturbance of visual fields        | Normal                                                               | No study | 50                      | Non-f               |
| 2        | 51/F          | Disturbance of visual fields        | Normal                                                               | No study | 45                      | Non-f               |
| 3        | 64/F          | Parkinsonism                        | Partial-hyper <sup>a</sup> (FSH)                                     | No study | 43                      | Non-f               |
| 4        | 50/M          | Disturbance of visual fields        | Normal                                                               | No study | 40                      | Non-f               |
| 5        | 54/F          | Acromegaly                          | Partial-hyper <sup>a</sup> (GH, LH, FSH)                             | No study | 40                      | GHs                 |
| 6        | 66/M          | Disturbance of vision               | Normal                                                               | No study | 35                      | Non-f               |
| 7        | 63/F          | None (incidental)                   | Partial-hyper <sup>a</sup> (LH, FSH)                                 | No study | 32                      | Non-f               |
| 8        | 58/M          | Disturbance of vision               | Normal                                                               | No study | 30                      | Non-f               |
| 9        | 72/M          | Disturbance of vision/visual fields | Partial-hypo <sup>b</sup> (LH)                                       | Normal   | 29                      | Non-f               |
| 10       | 45/F          | Amenorrhea                          | Partial-hyper <sup>a</sup> (GH)/partial-hypo <sup>b</sup> (LH)       | No study | 29                      | GHs                 |
| 11       | 44/M          | Disturbance of vision/visual fields | Normal                                                               | Normal   | 28                      | Non-f               |
| 12       | 53/M          | Exophthalmos                        | Normal                                                               | No study | 28                      | Non-f               |
| 13       | 49/M          | Disturbance of vision               | Normal                                                               | No study | 27                      | Non-f               |
| 14       | 59/M          | Disturbance of vision               | Normal                                                               | No study | 27                      | Non-f               |
| 15       | 62/F          | Headache                            | Partial-hyper <sup>a</sup> (LH, FSH)/partial-hypo <sup>b</sup> (TSH) | No study | 25                      | PRLs                |
| 16       | 25/M          | None (incidental)                   | Normal                                                               | No study | 23                      | Non-f               |
| 17       | 44/F          | Headache                            | Partial-hyper <sup>a</sup> (ACTH)                                    | No study | 19                      | Non-f               |
| 18       | 25/F          | Amenorrhea, galactorrhea            | Partial-hyper <sup>a</sup> (PRL)                                     | No study | 15                      | PRLs                |
| 19       | 68/M          | None (incidental)                   | Normal                                                               | No study | 15                      | Non-f               |
| 20       | 25/F          | Amenorrhea                          | Partial-hyper <sup>a</sup> (PRL)/partial-hypo <sup>b</sup> (GH)      | No study | 14                      | Non-f               |
| 21       | 27/F          | Amenorrhea                          | Partial-hyper <sup>a</sup> (PRL)                                     | Normal   | 7                       | PRLs                |
| 22       | 29/F          | Galactorrhea                        | Partial-hyper <sup>a</sup> (GH)                                      | Normal   | 5                       | GHs                 |

<sup>a</sup> Excess hormones.

<sup>b</sup> Insufficient hormones.

**On-line Table 3: MRI findings in patients with LYH and PA**

| Case No. | PPHI |    | Thickened Stalk <sup>a</sup> |         | Pituitary Symmetry <sup>b</sup> |    | Homogeneous Enhancement <sup>c</sup> |    | T2WI Parasellar Intensity <sup>d</sup> |     | T1WI Parasellar Intensity <sup>e</sup> |     | Dural Tail <sup>f</sup> |    |
|----------|------|----|------------------------------|---------|---------------------------------|----|--------------------------------------|----|----------------------------------------|-----|----------------------------------------|-----|-------------------------|----|
|          | LYH  | PA | LYH                          | PA      | LYH                             | PA | LYH                                  | PA | LYH                                    | PA  | LYH                                    | PA  | LYH                     | PA |
| 1        | -    | +  | +                            | -       | +                               | -  | +                                    | -  | Dark                                   | Iso | Iso                                    | Iso | +                       | -  |
| 2        | -    | +  | -                            | Unclear | +                               | -  | -                                    | -  | Dark                                   | Iso | Iso                                    | Iso | +                       | +  |
| 3        | +*   | +  | +                            | Unclear | +                               | -  | -                                    | -  | Dark                                   | Iso | Low                                    | Iso | +                       | +  |
| 4        | -    | -  | +                            | Unclear | -                               | -  | +                                    | -  | Dark                                   | Iso | Iso                                    | Iso | -                       | -  |
| 5        | -    | +  | +                            | -       | +                               | -  | +                                    | -  | Dark                                   | Low | Iso                                    | Iso | -                       | -  |
| 6        | -    | -  | +                            | Unclear | +                               | -  | +                                    | -  | Dark                                   | Iso | Iso                                    | Iso | -                       | +  |
| 7        | -    | +  | +                            | -       | +                               | -  | -                                    | -  | Dark                                   | Iso | Low                                    | Iso | +                       | +  |
| 8        | +    | +* | Unclear                      | -       | +                               | -  | No study                             | -  | Iso                                    | Iso | Iso                                    | Iso | No study                | +  |
| 9        | -    | +* | Unclear                      | -       | -                               | -  | -                                    | -  | Iso                                    | Iso | Iso                                    | Iso | +                       | +  |
| 10       | -    | +* | +                            | -       | +                               | -  | +                                    | -  | Iso                                    | Iso | Iso                                    | Iso | -                       | +  |
| 11       | -    | +  | +                            | -       | +                               | +  | +                                    | -  | Iso                                    | Iso | Iso                                    | Iso | +                       | +  |
| 12       | -    | +  | +                            | -       | +                               | -  | +                                    | -  | Iso                                    | Iso | Iso                                    | Iso | +                       | +  |
| 13       | +    | -  | +                            | -       | +                               | -  | +                                    | -  | Iso                                    | Iso | Iso                                    | Iso | +                       | -  |
| 14       | -    | +  | +                            | -       | +                               | -  | -                                    | -  | Iso                                    | Iso | Iso                                    | Iso | +                       | +  |
| 15       | -    | +  | +                            | -       | +                               | -  | +                                    | -  | Iso                                    | Iso | Iso                                    | Iso | +                       | +  |
| 16       | -    | +  | +                            | -       | +                               | -  | +                                    | -  | Iso                                    | Iso | Iso                                    | Iso | -                       | +  |
| 17       | -    | +  | +                            | -       | -                               | +  | -                                    | -  | Iso                                    | Iso | Iso                                    | Iso | -                       | +  |
| 18       | -    | +* | +                            | -       | +                               | -  | +                                    | -  | Iso                                    | Low | Iso                                    | Iso | +                       | +  |
| 19       | -    | +  | +                            | -       | +                               | -  | +                                    | -  | Iso                                    | Iso | Iso                                    | Iso | +                       | -  |
| 20       | -    | +  | +                            | -       | +                               | -  | +                                    | -  | Iso                                    | Iso | Iso                                    | Iso | +                       | +  |
| 21       | -    | +  | -                            | -       | -                               | -  | -                                    | +  | Iso                                    | Iso | Iso                                    | Iso | +                       | +  |
| 22       | -    | +  | -                            | -       | -                               | -  | -                                    | +  | Iso                                    | Iso | Iso                                    | Iso | +                       | +  |

**Note:** — indicates not identified, +, identified; +\*, ectopic PPHI identified.

<sup>a</sup> Thickened stalk is classified as follows: - indicates that the diameter of pituitary stalk was <3.5 mm; +, the diameter of pituitary stalk exceeded 3.5 mm; Unclear, the stalk was unclear due to pituitary tumoral compression.

<sup>b</sup> Pituitary symmetry is classified as follows: - indicates asymmetry; +, symmetry.

<sup>c</sup> Enhancement pattern was classified as follows: - indicates heterogeneous; +, homogeneous.

<sup>d</sup> Parasellar signal intensity on T2WI is classified as follows: Dark indicates isointense with bone cortex; Low, isointense with white matter; Iso, isointense with gray matter; High, hyperintense with gray matter.

<sup>e</sup> Parasellar signal intensity on T1WI is classified as follows: Dark indicates isointense with bone cortex; Low, isointense with CSF; Iso, isointense with gray matter; High, hyperintense with gray matter.

<sup>f</sup> Dural tail is classified as follows: - indicates not identified; +, identified.

**On-line Table 4: The details of MRI Findings in 7 Patients with LYH Who Showed Parasellar Dark Signal Intensity on T2WI**

| Case No.       | Age (yr)/ Sex | MRI Study | Interval between Studies | Enlargement of AL <sup>a</sup> | Thickened Stalk <sup>a</sup> | Dark-Signal-Intensity Areas on T2WI        |                                               | ICA Abnormality |
|----------------|---------------|-----------|--------------------------|--------------------------------|------------------------------|--------------------------------------------|-----------------------------------------------|-----------------|
|                |               |           |                          |                                |                              | Around Pituitary Gland                     | Cavernous Sinus                               |                 |
| 1 <sup>b</sup> | 38/F          | 1st       |                          | ++                             | +                            | -                                          | Both sides swollen, T2 dark, poor enhancement | Narrowed L ICA  |
| 2 <sup>b</sup> | 53/M          | 1st       | 8 Months                 | ++                             | -                            | -                                          | L side swollen, T2 dark                       | Narrowed L ICA  |
|                |               | 2nd       |                          | ++                             | -                            | -                                          | No change                                     | No change       |
| 3              | 70/M          | 1st       |                          | +                              | +                            | T2 dark around AL and PL, poor enhancement | Both sides T2 low, poor enhancement           | -               |
|                |               | 2nd       | 35 Months                | +                              | +                            | No change                                  | No change                                     | -               |
|                |               | 3rd       | 6 Months                 | +                              | +                            | No change                                  | No change                                     | No change       |
| 4              | 36/M          | 1st       |                          | -                              | +                            | Thin T2 dark on the upper edge of PL       | -                                             | -               |
|                |               | 2nd       | 2 Months                 | +                              | ++                           | T2 dark around PL thickened                | -                                             | -               |
|                |               | 3rd       | 6 Months                 | ++                             | +                            | T2 dark around PL more thickened           | R side swollen, T2 dark                       | Narrowed R ICA  |
| 5              | 71/M          | 1st       |                          | -                              | +                            | -                                          | -                                             | -               |
|                |               | 2nd       | 3 Months                 | +                              | ++                           | -                                          | -                                             | -               |
|                |               | 3rd       | 17 Months                | -                              | +                            | T2 dark on the upper edge of AL and PL     | Both sides T2 low                             | -               |
| 6              | 48/M          | 1st       |                          | ++                             | +                            | -                                          | -                                             | -               |
|                |               | 2nd       | 2 Months                 | +                              | -                            | -                                          | Both sides swollen, T2 dark, poor enhancement | -               |
|                |               | 3rd       | 4 Months                 | -                              | -                            | -                                          | No change                                     | -               |
|                |               | 4th       | 3 Months                 | -                              | -                            | -                                          | No change                                     | -               |
| 7              | 49/M          | 1st       |                          | +                              | +                            | T2 dark around AL and PL, poor enhancement | -                                             | -               |
|                |               | 2nd       | 3 Months                 | +                              | +                            | No change                                  | -                                             | -               |

<sup>a</sup> Diagnosed histologically by transsphenoidal biopsy.

<sup>b</sup> Enlargement of AL and thickened stalk was classified as follows: - indicates the size of AL was normal; +, size of AL was moderately enlarged; ++, size of AL was prominently enlarged.
